# Supplementary material
Source: PubMed Central journal article supplement (PMC7065480)
Supplement: baADV2019001157-suppl1.pdf [file baADV2019001157-suppl1.pdf]

## Supplementary document

### **Sørensen *et al.*, Clonal Hematopoiesis Predicts Development of Therapy-related Myeloid Neoplasms post-Autologous Stem Cell Transplantation**

#### **1. Supplementary Methods**

- Matching
- Flow cytometry
- Myeloid next-generation sequencing panel
- Variant calling
- Survival analyses

#### **2. Supplementary Tables**

- Supplement Table 1A. Patient characteristics, cases
- Supplement Table 1B. Patient characteristics, controls
- Supplement Table 2. Patient characteristics at tMN diagnosis
- Supplement Table 3. Detailed characteristics of somatic mutations detected in leukapheresis sample
- Supplement Table 4. Odds Ratios for development of tMN for patients with one or more detectable mutation, or aberrant expression of CD7

#### **3. Supplementary Figures**

- Supplement Figure 1. Gating strategy
- Supplement Figure 2. Quality of targeted next-generation sequencing for determination of variant calling.
- Supplement Figure 3. Numbers and characteristics of somatic mutations detected by NGS in cases and controls
- Supplement Figure 4. Figure 4. Survival of patients with tMN

## Supplementary Methods

### **Matching**

All controls had as long, or longer follow-up than their respective case with the exception of 2 patients who had 18 and 337 days longer latency than their respective case. In these 2 instances, it was deemed to have negligible influence as both controls had more than 10 years of total follow-up after ASCT before the date of censoring. For 9 patients it was not possible to match age within a frame of 5 years (primarily due to follow-up time having priority). For two cases, the age at ASCT was 29 years, and due to a limited number of patients in this age group, an older control was chosen. For the 7 remaining patients, 2 of the controls chosen were more than 5 years younger than their respective case at ASCT. One patient, 1206, did not have available data from the ASCT treatment, and was matched with a control that received BEAM conditioning.

### **Flow cytometry**

In the gating strategy used (Supplemental Figure 2), live cells were identified in a forward scatter (FSC) versus side scatter (SSC) plot after which doublet exclusion was performed using a FSC height versus area plot. In a SSC versus CD45 expression plot we defined a CD45<sup>low</sup>/SSC<sup>low</sup> "blast gate". As monocytes may be located in close proximity to the "blast gate", we used CD14 to exclude potential monocyte contamination. Within the SSC<sup>low</sup>CD45<sup>low</sup>CD14<sup>-</sup> population, we identified CD34<sup>+</sup>CD38<sup>-</sup> stem cells based on nucleated erythroid cells as internal negative control. This gating strategy was applied to avoid contamination of the stem cell gate by inclusion of CD38<sup>dim</sup> progenitor cells. The stem cell populations (SSC<sup>low</sup>CD45<sup>low</sup>CD34<sup>+</sup>CD38<sup>-</sup>) were evaluated for aberrant positive expression of CLEC12A, CD7, CD19 and CD123 in order to assess the presence of potential LSCs.

### **Myeloid next-generation sequencing panel**

The individual genes were sorted in different categories based on their function within the cell as reported in the Genetics Home Reference by the National Institute of Health (11).

### **Variant calling**

Cutoff values for variant calling were determined based on analysis of data from .vcf files from all NGS analyses performed (Supplemental Figure 2). Most observations were located at frequencies < 0.5%, indicating a high number of false positive variants within this range of frequencies, primarily located at frequencies lower than 0.2% (Supplemental Figure 2D). Of all observations with VAF under 0.5%, just 1% of observations were located at an allele frequency  $\geq 0.3\%$ , and thus, this was chosen as the cutoff VAF in this study. It remains possible that false positive observations are present within the 1% low frequency mutations located at allele frequencies  $\geq 0.3\%$ , but we expect that nearly all false positive observations have been excluded using this cutoff combined with the read depth cutoff.

The VAF cutoff resulted in exclusion of 1 mutation (*ZRSR2*) that had a VAF 0.1%, but sufficient read depth to be included otherwise. After exclusion, the mutation reported with the lowest VAF in this study had a VAF of 0.5%.

### **Survival**

Survival analysis was performed using the Kaplan-Meier Methods, and hazard ratios were calculated via Cox-Regression analysis. Survival was defined as until death from any cause after being diagnosed with tMN or censoring.

# Supplementary Tables

**Supplemental Table 1A.**

| ID   | Indication for ASCT | Age at ASCT | Gender | Priming         | Induction            | Conditioning         | Relapse | Cytotoxic treatment post-ASCT | Time to tMN (years) | Age at tMN | tMN Diagnosis | Cytogenetics | Treatment Intention | Survival (days) | Allo-SCT |    |
|------|---------------------|-------------|--------|-----------------|----------------------|----------------------|---------|-------------------------------|---------------------|------------|---------------|--------------|---------------------|-----------------|----------|----|
| 1174 | MM                  | 66          | Male   | Cyklophosphamid | VRd                  | HD-Melphalan         | Yes     | Yes                           | 3.4                 | 69         | MDS           | Complex      | Palliative          | 105             | No       |    |
| 1175 | TBCL                | 68          | Male   | R-CHOP          | R-CHOP               | BEAM                 | No      | No                            | 0.8                 | 69         | MDS           | -7/del7q     | Curative            | 1940*           | Yes      |    |
| 1176 | MM                  | 56          | Male   | Cyklophosphamid | Cy-Dex               | HD-Melphalan         | Yes     | No                            | 11.0                | 67         | MDS           | Complex      | Palliative          | 266             | No       |    |
| 1177 | MM                  | 58          | Male   | Cyklophosphamid | ACVDL                | HD-Melphalan         | Yes     | Yes                           | 7.4                 | 65         | AML           | nd.          | Palliative          | 2               | No       |    |
| 1178 | TBCL                | 68          | Male   | CHOP            | R-DHAP               | BEAM                 | No      | No                            | 0.7                 | 69         | MDS           | Normal       | Palliative          | 2784*           | No       |    |
| 1179 | MCL                 | 65          | Male   | R-araC          | R-araC               | BEAM                 | No      | No                            | 6.1                 | 71         | MPN           | Other        | Palliative          | 1218*           | No       |    |
| 1180 | Hodgkin             | 66          | Male   | araC            | DHAP                 | BEAM                 | No      | No                            | 4.2                 | 70         | MDS           | Complex      | Palliative          | 168             | No       |    |
| 1181 | MCL                 | 54          | Male   | R-araC          | R-maxi-CHOP + R-araC | BEAM                 | No      | No                            | 1.9                 | 56         | AML           | Complex      | Curative            | 312             | No       |    |
| 1182 | MM                  | 57          | Male   | Cyklophosphamid | Cyklophosphamid      | HD-Melphalan         | Yes     |                               | 1.1                 | 58         | MDS           | Normal       | ND                  | 227             | No       |    |
| 1183 | PTCL                | 29          | Female | CHOEP           | CHOEP                | BEAM                 | Yes     | No                            | 2.8                 | 32         | MDS           | Normal       | Palliative          | 62              | No       |    |
| 1184 | MM                  | 60          | Male   | Cyklophosphamid | VCD                  | HD-Melphalan         | No      | No                            | 0.9                 | 61         | MDS           | Other        | Palliative          | 853*            | No       |    |
| 1185 | TBCL                | 69          | Male   | Rituximab       | R-CHOP + methotrexat | TBI-Cyklophosphamide | Yes     | Yes                           | 1.1                 | 70         | MDS           | -7/del7q     | Azaciditin          | 614             | No       |    |
| 1186 | PTCL                | 50          | Male   | DHAP            | DHAP                 | BEAM                 | Yes     | Yes                           | 7.7                 | 58         | MDS           | Complex      | Azaciditin          | 136             | No       |    |
| 1187 | MCL                 | 63          | Male   | Rituximab       | R-maxi-CHOP + R-araC | R-BEAM               | No      | No                            | 3.5                 | 66         | AML           | Complex      | Azaciditin          | 149             | No       |    |
| 1188 | TBCL                | 58          | Male   | MIME            | R-DHAP               | TBI-Cyklophosphamide | No      | No                            | 0.2                 | 58         | MDS           | nd.          | Palliative          | 27              | No       |    |
| 1189 | MCL                 | 64          | Male   | Rituximab       | R-maxi-CHOP + R-araC | BEAM                 | Yes     | Yes                           | 8.3                 | 72         | AML           | Complex      | Azaciditin          | 565             | No       |    |
| 1190 | MM                  | 69          | Male   | Cyklophosphamid | VCD                  | HD-Melphalan         | No      | No                            | 3.6                 | 73         | AML           | Normal       | Azaciditin          | 25              | No       |    |
| 1191 | MCL                 | 61          | Male   | Rituximab       | R-maxi-CHOP + R-araC | BEAM                 | Yes     | No                            | 1.5                 | 63         | MDS           | -7/del7q     | Curative            | 908*            | Yes      |    |
| 1192 | MCL                 | 68          | Male   | Rituximab       | R-maxi-CHOP + R-araC | BEAM                 | Yes     | Yes                           | 4.3                 | 72         | MDS           | Normal       | Palliative          | 429*            | No       |    |
| 1193 | DLBCL               | 68          | Female | R-CHOP          | R-DHAP               | BEAM                 | Yes     | Yes                           | 3.2                 | 71         | AML           | Complex      | Azaciditin          | 57              | No       |    |
| 1194 | DLBCL               | 58          | Female | CHOP            | R-MIME               | BEAM                 | No      | Yes                           | 12.1                | 70         | MDS           | Other        | Azaciditin          | 623             | No       |    |
| 1195 | TCL                 | 59          | Male   | CHOEP           | CHOEP                | BEAM                 | No      | No                            | 1.4                 | 60         | MDS           | Normal       | Palliative          | 924             | No       |    |
| 1196 | TBCL                | 40          | Female | CHOP            | MIME                 | TBI-Cyklophosphamide | Yes     | No                            | 3.6                 | 44         | MDS           | Other        | Curative            | 494             | Yes      |    |
| 1197 | DLBCL               | 55          | Male   | MIME            | MIME                 | TBI-Cyklophosphamide | No      | No                            | 6.7                 | 62         | MDS           | Complex      | Curative            | 565             | No       |    |
| 1198 | TCL                 | 37          | Female | Cyklophosphamid | CHOEP                | BEAM                 | Yes     | Yes                           | 0.7                 | 38         | AML           | Other        | Palliative          | 58              | No       |    |
| 1199 | TCL                 | 42          | Male   | CHOP            | CHOP + metotrexat    | TBI-Cyklophosphamide | No      | No                            | 8.6                 | 51         | AML           | Complex      | Curative            | 34              | No       |    |
| 1200 | DLBCL               | 44          | Male   | MIME            | MIME                 | BEAM                 | No      | No                            | 5.2                 | 49         | MDS           | Complex      | Curative            | 328             | No       |    |
| 1201 | Hodgkin             | 35          | Male   | MIME            | MIME                 | TBI-Cyklophosphamide | No      | No                            | 9.9                 | 45         | MDS           | Complex      | Curative            | 176             | No       |    |
| 1202 | MM                  | 53          | Female | Cyklophosphamid | VAD                  | HD-Melphalan         | Yes     | Yes                           | 10.9                | 64         | AML           | nd.          | Palliative          | 8               | No       |    |
| 1204 | MM                  | 63          | Female | Cyklophosphamid | Cy-Dex               | HD-Melphalan         | Yes     | Yes                           | 7.6                 | 71         | MDS           | nd.          | Palliative          | 2268*           | No       |    |
| 1205 | TBCL                | 33          | Male   | Mab-Thera       | CHOP                 | R-ICE                | BEAM    | No                            | No                  | 2.3        | 35            | AML          | -7/del7q            | Curative        | 84       | No |
| 1206 | Seminoma            | 29          | Male   | ND              | ND                   | ND                   | No      | No                            | 18.1                | 47         | MDS           | Other        | Curative            | 141             | No       |    |
| 1207 | MCL                 | 54          | Male   | R-CHOP          | R-maxi-CHOP + R-araC | BEAM                 | No      | ND                            | 3.6                 | 58         | MDS           | Complex      | Palliative          | 8               | No       |    |
| 1208 | MM                  | 59          | Male   | Cyklophosphamid | VAD                  | HD-Melphalan         | Yes     | Yes                           | 2.7                 | 62         | MDS           | -5/del5q     | ND                  | 661             | ND       |    |
| 1209 | ALL                 | 54          | Male   | Cyklophosphamid | CHOP                 | TBI-Cyklophosphamide | No      | No                            | 15.3                | 69         | MDS           | Other        | Palliative          | 438             | No       |    |
| 1245 | MCL                 | 48          | Male   | AraC            | R-maxi-CHOP + R-araC | BEAM                 | Yes     | Yes                           | 5.7                 | 54         | MDS           | -7/del7q     | Curative            | 914             | Yes      |    |

**Supplemental Table 1A. Patient characteristics, cases.** ALL: Acute Lymphoblastic Leukemia; AML: Acute Myeloid Leukemia; DLBCL: Diffuse Largecell B-Cell Lymphoma; MCL: Mantlecell Lymphoma; MDS: Myelodysplastic Syndrome MM: Multiple Myeloma; MPN: Myeloproliferative Neoplasm; PTCL: Peripheral T-Cell Lymphoma; TBCL: Transformed B-Cell Lymphoma; TCL: T-Cell Lymphoma.

\* Alive at study end.

**Supplemental Table 1B.**

| ID   | Indication for ASCT | Age at ASCT | Gender | Priming             | Induction            | Conditioning         | Relapse | Cytotoxic treatment post-ASCT | Follow-up (years) |
|------|---------------------|-------------|--------|---------------------|----------------------|----------------------|---------|-------------------------------|-------------------|
| 1210 | MM                  | 66          | Male   | Cyclophosphamid     | Vd                   | HD-Melphalan         | Yes     | Yes                           | 4.3               |
| 1211 | TBCL                | 64          | Male   | R-CHOP              | R-CHOP               | BEAM                 | No      | No                            | 6.2               |
| 1212 | MM                  | 58          | Male   | Cyclophosphamid     | Cy-Dex               | HD-Melphalan         | Yes     | No                            | 10.1              |
| 1213 | MM                  | 60          | Male   | Cyclophosphamid     | ACVDL                | HD-Melphalan         | Yes     | Yes                           | 8.4               |
| 1214 | DLBCL               | 64          | Male   | R-DHAP              | R-DHAP               | BEAM                 | No      | No                            | 8.4               |
| 1215 | MCL                 | 63          | Male   | R-maxi-CHOP + RaraC | R-araC               | BEAM                 | No      | No                            | 9.4               |
| 1216 | Hodgkin             | 66          | Male   | DHAP                | DHAP                 | BEAM                 | No      | No                            | 10.0              |
| 1217 | MCL                 | 58          | Male   | R-araC              | R-maxi-CHOP + R-araC | BEAM                 | Yes     | Yes                           | 5.6               |
| 1218 | MM                  | 58          | Male   | Cyclophosphamid     | Cy-Dex               | HD-Melphalan         | Yes     | Yes                           | 5.3               |
| 1219 | PTCL                | 35          | Female | CHOEP               | CHOEP                | BEAM                 | No      | No                            | 12.0              |
| 1220 | PTCL                | 53          | Male   | CHOEP               | CHOEP                | BEAM                 | Yes     | Yes                           | 12.7              |
| 1221 | MCL                 | 60          | Male   | Rituximab           | AraC                 | BEAM                 | No      | No                            | 12.1              |
| 1222 | TBCL                | 57          | Male   | Rituximab           | CHOEP                | TBI-Cyclophosphamide | Yes     | Yes                           | 4.6               |
| 1223 | MCL                 | 59          | Male   | Rituximab           | R-maxi-CHOP + R-araC | BEAM                 | No      | No                            | 13.1              |
| 1224 | MM                  | 60          | Male   | Cyclophosphamid     | VAD                  | HD-Melphalan         | Yes     | Yes                           | 13.6              |
| 1225 | MCL                 | 63          | Male   | Rituximab           | R-maxi-CHOP + R-araC | BEAM                 | No      | No                            | 4.4               |
| 1226 | MCL                 | 67          | Male   | Rituximab           | R-maxi-CHOP + R-araC | BEAM                 | No      | No                            | 5.7               |
| 1227 | DLBCL               | 56          | Female | Cyclophosphamid     | DHAP                 | BEAM                 | No      | No                            | 4.5               |
| 1228 | DLBCL               | 57          | Female | R-MIME              | R-MIME               | BEAM                 | Yes     | Yes                           | 12.0              |
| 1229 | TBCL                | 50          | Female | Rituximab           | R-CHOP               | TBI-Cyclophosphamide | No      | No                            | 13.1              |
| 1230 | TBCL                | 55          | Male   | Rituximab           | CHOP                 | TBI-Cyclophosphamide | Yes     | Yes                           | 10.1              |
| 1231 | PTCL                | 37          | Female | CHOP                | CHOP + ICE           | BEAM                 | Yes     | Yes                           | 2.2               |
| 1232 | Hodgkin             | 37          | Male   | MIME                | MIME                 | TBI-Cyclophosphamide | No      | No                            | 16.7              |
| 1233 | DLBCL               | 52          | Male   | Cyclophosphamid     | MIME                 | BEAM                 | No      | Yes                           | 15.6              |
| 1234 | MM                  | 58          | Male   | Cyclophosphamid     | VAD                  | HD-Melphalan         | Yes     | Yes                           | 12.9              |
| 1235 | MM                  | 62          | Male   | Cyclophosphamid     | VCD                  | HD-Melphalan         | No      | No                            | 3.1               |
| 1236 | TBCL                | 67          | Male   | R-CHOP              | R-CHOP-14 + 2R       | TBI-Cyclophosphamide | No      | No                            | 3.8               |
| 1237 | DLBCL               | 58          | Female | MabThera + MIME     | R-MIME               | BEAM                 | Yes     | Yes                           | 2.9               |
| 1238 | MM                  | 63          | Female | Cyclophosphamid     | CyDex                | HD-Melphalan         | Yes     | Yes                           | 14.6              |
| 1239 | MCL                 | 62          | Male   | R-araC              | R-maxi-CHOP + R-araC | BEAM                 | Yes     | Yes                           | 8.7               |
| 1240 | MCL                 | 60          | Male   | MabThera            | R-maxi-CHOP + R-araC | BEAM                 | Yes     | Yes                           | 3.8               |
| 1241 | Hodgkin             | 35          | Male   | MIME                | MIME                 | BEAM                 | No      | No                            | 16.4              |
| 1242 | MM                  | 65          | Male   | Cyclophosphamid     | CyDex                | HD-Melphalan         | Yes     | Yes                           | 9.6               |
| 1243 | MCL                 | 48          | Male   | R-araC              | R-maxi-CHOP + R-araC | BEAM                 | No      | No                            | 11.8              |
| 1244 | Burkitt             | 56          | Male   | CHOP                | LBLx4 (CHOP + Mtx)   | TBI-Cyclophosphamide | No      | Yes                           | 14.9              |
| 1246 | MCL                 | 50          | Male   | R-araC              | R-maxi-CHOP + R-araC | BEAM                 | No      | No                            | 14.6              |

**Supplemental Table 1B. Patient characteristics, controls.** DLBCL: Diffuse Largecell B-Cell Lymphoma; MCL: Mantlecell Lymphoma; MM: Multiple Myeloma; PTCL: Peripheral T-Cell Lymphoma; TBCL: Transformed B-Cell Lymphoma

**Supplemental Table 2.**

| <b>Characteristics</b>                            | <b>tMDS (n=25)</b>  | <b>tAML (n=10)</b>  |
|---------------------------------------------------|---------------------|---------------------|
| Age, years (range)                                | 61.6 (31.7 to 72.2) | 64.6 (35.3 to 72.5) |
| Hemoglobin, mmol/l (range)                        | 6.4 (5.1 to 9.5)    | 5.4 (4.3 to 6.4)    |
| Total Leukocytes, x10 <sup>9</sup> (range)        | 3.0 (1.5 to 40.7)   | 3.3 (0.3 to 60.7)   |
| Neutrophil granulocytes, x10 <sup>9</sup> (range) | 1.44 (0.3 to 25.8)  | 0.63 (0.1 to 5.8)   |
| Platelets, x10 <sup>9</sup> (range)               | 41 (7 to 346)       | 25 (6 to 322)       |
| Bone marrow blasts at diagnosis, % (range)        | 0 (0 to 15)         | 30 (20 to 80)       |
| Karyotype (n)                                     |                     |                     |
| Complex                                           | 8                   | 5                   |
| -7/del7q                                          | 4                   | 1                   |
| -5/-5delq                                         | 1                   | 0                   |
| Normal                                            | 5                   | 1                   |
| Other                                             | 5                   | 1                   |
| Not done                                          | 2                   | 2                   |
| Treated with curative intent (n)                  | 8                   | 3                   |
| Allogeneic transplantation (n)                    | 4                   | 0                   |

**Supplemental Table 2. Patient characteristics at tMN diagnosis.**

**Supplemental Table 3**

|                 | ID           | Gene          | VAF         | Type       | Basesub  | Depth   | c.DNA              | Protein Alt        | Chromosome             |           |
|-----------------|--------------|---------------|-------------|------------|----------|---------|--------------------|--------------------|------------------------|-----------|
| <b>Cases</b>    | 1175         | <i>TP53</i>   | 1.3         | Missense   | C>T/A>G  | 8695    | 659A>G             | Tyr220Cys          | 17                     |           |
|                 | 1177         | <i>TP53</i>   | 1.0         | Missense   | T>C/G>A  | 6765    | 711G>A             | Met237Ile          | 17                     |           |
|                 | 1179         | <i>CALR</i>   | 40.3        | Frameshift | Not SNV  |         | 10791              | 1154_1155insTTGTC  | Lys385Asnfs*?          | 19        |
|                 |              | <i>SF3B1</i>  | 1.6         | Missense   |          | G>C     | 10765              | 1998G>C            | Lys666Asn              | 2         |
|                 |              | <i>HRAS</i>   | 0.8         | Missense   |          | C>T/A>G | 10866              | 106A>G             | Ile36Val               | 11        |
|                 |              | <i>ZRSR2</i>  | 1.9         | Frameshift | Not SNV  |         | 5267               | 984_987delTCTT     | Leu329Metfs*?          | X         |
|                 |              | <i>ZRSR2</i>  | 0.8         | Missense   |          | T>C/G>A | 5246               | 986T>C             | Leu329Pro              | X         |
|                 |              | 1180          | <i>TP53</i> | 0.6        | Missense |         | T>C/G>A            | 8927               | 743G>A                 | Arg248Gln |
|                 | 1182         | <i>ASXL1</i>  | 2.7         | Frameshift | Not SNV  |         | 10030              | 1748_1755delGG     | Trp583*fs*1            | 20        |
|                 | 1184         | <i>SF3B1</i>  | 14.8        | Missense   |          | T>C/G>A | 5621               | 1874G>A            | Arg625His              | 2         |
|                 | 1185         | <i>SRSF2</i>  | 0.5         | Missense   |          | C>A/T>G | 6016               | 284C>A             | Pro95His               | 17        |
|                 |              | <i>ASXL1</i>  | 1.1         | Stop       |          | C>T/A>G | 8533               | 1471C>T            | Gln491*                | 20        |
|                 |              | <i>TP53</i>   | 1.4         | Missense   |          | T>C/G>A | 6416               | 734G>A             | Gly245Asp              | 17        |
|                 | 1186         | <i>TP53</i>   | 1.4         | Missense   |          | T>C/G>A | 10182              | 818G>A             | Arg273His              | 17        |
|                 | 1190         | <i>ASXL1</i>  | 30.8        | Frameshift | Not SNV  |         | 9803               | 1934dupG           | Gly646Trpfs*12         | 20        |
|                 |              | <i>SRSF2</i>  | 34.8        | Missense   |          | C>A/T>G | 7762               | 284C>A             | Pro95His               | 17        |
|                 |              | 1191          | <i>NRAS</i> | 1.9        | Missense |         | G>C                | 9421               | 37G>C                  | Gly13Arg  |
|                 |              | <i>JAK2</i>   | 0.7         | Missense   |          | A>C/G>T | 9026               | 1849G>T            | Val617Phe              | 9         |
|                 | 1192         | <i>ASXL1</i>  | 1.2         | Stop       |          | C>T/A>G | 7550               | 1534C>T            | Gln512*                | 20        |
|                 | 1197         | <i>TP53</i>   | 1.0         | Missense   |          | T>C/G>A | 6960               | 428T>C             | Val143Ala              | 17        |
|                 | 1198         | <i>ASXL1</i>  | 12.1        | Stop       |          | C>A/T>G | 9874               | 2066C>A            | Ser689*                | 20        |
|                 |              | <i>EZH2</i>   | 10.8        | Frameshift | Not SNV  |         | 8633               | 1123_1124insGA     | Ile375Argfs*50         | 7         |
|                 |              | <i>EZH2</i>   | 11.8        | Missense   |          | C>T/A>G | 9571               | 1696C>T            | Arg566Cys              | 7         |
|                 |              | <i>WT1</i>    | 9.5         | INDEL      | Not SNV  |         | 10323              | 1301_1302insAACACA | Arg434_Ser435insThrHis | 11        |
|                 | 1199         | <i>BRAF</i>   | 0.9         | Missense   |          | C>T/A>G | 8303               | 1781A>G            | Asp594Gly              | 7         |
|                 | 1201         | <i>ASXL1</i>  | 47.8        | Missense   |          | C>T/A>G | 9492               | 2237C>T            | Ala746Val              | 20        |
| 1207            | <i>TP53</i>  | 4.9           | Splicesite  |            | C>T/A>G  | 6374    | 673-2A>G           | n/a                | 17                     |           |
|                 | <i>ZRSR2</i> | 1.1           | Missense    |            | T>C/G>A  | 4959    | 560G>A             | Cys187Tyr          | X                      |           |
| 1245            | <i>TP53</i>  | 0.6           | Missense    |            | C>A/T>G  | 8109    | 464C>A             | Thr155Asn          | 17                     |           |
|                 | <i>ZRSR2</i> | 99.2          | INDEL       | Not SNV    |          | 4540    | 1338_1343dupGAGCCG | Ser447_Arg448dup   | X                      |           |
| <b>Controls</b> | 1213         | <i>EZH2</i>   | 49.8        | INDEL      | Not SNV  | 10016   | 552_554delTGA      | Asp189del          | 7                      |           |
|                 |              | <i>CBL</i>    | 0.5         | Missense   |          | T>C/G>A | 9820               | 1259G>A            | Arg420Gln              | 11        |
|                 |              | <i>TP53</i>   | 0.5         | Missense   |          | C>A/T>G | 7027               | 752T>G             | Ile251Ser              | 17        |
|                 | 1216         | <i>TP53</i>   | 1.4         | Missense   |          | T>C/G>A | 9469               | 824G>A             | Cys275Tyr              | 17        |
|                 | 1223         | <i>CSF3R</i>  | 49.4        | Missense   |          | C>A/T>G | 8365               | 1142C>A            | Ala381Asp              | 1         |
|                 | 1230         | <i>SETBP1</i> | 51.7        | Missense   |          | T>C/G>A | 9435               | 3343G>A            | Val1115Ile             | 18        |
|                 | 1235         | <i>CBL</i>    | 30.5        | Missense   |          | T>C/G>A | 9307               | 1244G>A            | Gly415Asp              | 11        |

**Supplemental Table 3.** Detailed characteristics of somatic mutations detected in leukapheresis samples.

**Supplemental Table 4**

|       | ID     | Gene   | VAF          | Type         | Basesub | Depth                | c.DNA                  | Protein Alt      |
|-------|--------|--------|--------------|--------------|---------|----------------------|------------------------|------------------|
| Cases | 1174   | DNMT3A | 1.0          | Missense     | T>C/G>A | 9986                 | 2578T>C                | Trp860Arg        |
|       |        | DNMT3A | 1.7          | Missense     | C>T/A>G | 9007                 | 1858C>T                | Pro620Ser        |
|       |        | DNMT3A | 0.7          | Missense     | T>C/G>A | 9614                 | 2114T>C                | Ile705Thr        |
|       | 1175   | DNMT3A | 14.1         | Frameshift   | Not SNV | 8298                 | 1688_1689delTG         | Val563Glyfs*14   |
|       |        | DNMT3A | 0.4          | Stop         | C>A/T>G | 10390                | 1988C>A                | Ser663*          |
|       | 1177   | DNMT3A | 1.8          | Stop         | T>C/G>A | 6836                 | 938G>A                 | Trp313*          |
|       |        | DNMT3A | 2.5          | Splice_donor | A>C/G>T | 8631                 | 1279+1G>T              |                  |
|       | 1179   | TET2   | 1.2          | Splice_donor | C>A/T>G | 11255                | 3954+2T>G              |                  |
|       | 1180   | DNMT3A | 1.3          | Missense     | T>C/G>A | 9069                 | 1541G>A                | Cys514Tyr        |
|       |        | DNMT3A | 0.4          | Frameshift   | Not SNV | 9960                 | 1269_1270delGC         | Glu423Aspfs*21   |
|       |        | DNMT3A | 0.9          | INDEL        | Not SNV | 9772                 | 1729_1737delAAGGAAAGAC | Lys577_Asp579del |
|       |        | DNMT3A | 0.4          | Frameshift   | Not SNV | 10126                | 1012delG               | Val338Trpfs*7    |
|       |        | DNMT3A | 0.7          | Missense     | C>T/A>G | 10171                | 2477A>G                | Lys826Arg        |
|       | 1181   | DNMT3A | 0.7          | Splice_donor | T>C/G>A | 9013                 | 2478+1G>A              |                  |
|       | 1182   | DNMT3A | 1.3          | Missense     | C>T/A>G | 9931                 | 2644C>T                | Arg882Cys        |
|       |        | TET2   | 3.6          | Missense     | T>C/G>A | 11188                | 3785G>A                | Arg1262Gln       |
|       | 1185   | TET2   | 0.4          | Stop         | C>T/A>G | 9748                 | 2710C>T                | Gln904*          |
|       |        | TET2   | 1.3          | Missense     | C>T/A>G | 8839                 | 55A>G                  | Ile19Val         |
|       | 1188   | DNMT3A | 1.1          | Missense     | G>C     | 8705                 | 2507G>C                | Arg836Thr        |
|       | 1189   | DNMT3A | 1.0          | Splice_donor | G>C     | 7366                 | 1015-1G>C              |                  |
|       | 1190   | TET2   | 1.1          | Splice_donor | T>C/G>A | 9133                 | 4044+1G>A              |                  |
|       |        | TET2   | 2.7          | Frameshift   | Not SNV | 9026                 | 4248_4249insA          | Val1417Serfs*9   |
|       |        | TET2   | 0.8          | Splice_donor | C>A/T>G | 9103                 | 3954+2T>G              |                  |
|       | 1191   | DNMT3A | 20.3         | Splice_donor | T>C/G>A | 9223                 | 1474+1G>A              |                  |
|       |        | DNMT3A | 0.5          | Splice_donor | G>C     | 8857                 | 2478+1G>C              |                  |
|       | 1192   | DNMT3A | 1.2          | Missense     | T>C/G>A | 7691                 | 2578T>C                | Trp860Arg        |
|       | 1193   | DNMT3A | 0.5          | Splice_donor | C>T/A>G | 7445                 | 1555-2A>G              |                  |
|       |        | TET2   | 0.4          | Stop         | C>T/A>G | 8904                 | 2227C>T                | Gln743*          |
|       | 1194   | DNMT3A | 47.5         | Missense     | T>C/G>A | 7299                 | 1811G>A                | Arg604Gln        |
|       | 1197   | DNMT3A | 0.6          | INDEL        | Not SNV | 9398                 | 2105_2110delATCTGG     | Asp702_Leu703del |
|       | 1200   | TET2   | 7.4          | Stop         | C>T/A>G | 8273                 | 4528C>T                | Gln1510*         |
|       |        | DNMT3A | 1.0          | Missense     | C>T/A>G | 7456                 | 2644C>T                | Arg882Cys        |
|       | 1207   | DNMT3A | 0.8          | Missense     | T>C/G>A | 8274                 | 1676G>A                | Cys559Tyr        |
|       | 1208   | DNMT3A | 1.1          | Stop         | C>A/T>G | 8441                 | 2049C>A                | Tyr683*          |
|       | 1209   | DNMT3A | 0.7          | Stop         | C>A/T>G | 8813                 | 1988C>A                | Ser663*          |
|       |        | DNMT3A | 0.9          | Stop         | C>T/A>G | 7674                 | 958C>T                 | Arg320*          |
| 1245  | DNMT3A | 0.6    | Missense     | T>G/C>A      | 8906    | 1049T>G              | Phe350Cys              |                  |
| 1210  | DNMT3A | 1.2    | Missense     | A>T/A>T      | 9407    | 2083A>T              | Ile695Phe              |                  |
| 1214  | DNMT3A | 1.0    | Missense     | T>C/G>A      | 8579    | 2251T>C              | Phe751Leu              |                  |
| 1216  | TET2   | 1.7    | Missense     | T>C/G>A      | 9266    | 5618T>C              | Ile1873Thr             |                  |
|       | TET2   | 0.6    | Frameshift   | Not SNV      | 8298    | 4153_4154delTT       | Leu1385Alafs*15        |                  |
|       | TET2   | 0.6    | Frameshift   | Not SNV      | 10160   | 530delC              | Pro177Glnfs*6          |                  |
| 1217  | DNMT3A | 2.7    | Missense     | C>T/A>G      | 8667    | 920C>T               | Pro307Leu              |                  |
| 1218  | DNMT3A | 6.3    | Frameshift   | Not SNV      | 9873    | 102delCinsTAA        | Glu36Argfs*37          |                  |
|       | TET2   | 0.3    | Missense     | T>C/G>A      | 10446   | 3455G>A              | Gly1152Glu             |                  |
| 1220  | TET2   | 8.0    | Frameshift   | Not SNV      | 9938    | 5448dupA             | His1817Thrfs*5         |                  |
|       | TET2   | 5.5    | Frameshift   | Not SNV      | 9181    | 4230delT             | Glu1411Aargfs*37       |                  |
|       | TET2   | 1.1    | Stop         | C>T/A>G      | 9761    | 2185C>T              | Gln729*                |                  |
|       | DNMT3A | 0.8    | Frameshift   | Not SNV      | 8854    | 2265dupT             | Glu756*fs*1            |                  |
| 1221  | DNMT3A | 0.7    | Missense     | C>T/A>G      | 9822    | 1642A>G              | Met548Val              |                  |
| 1223  | TET2   | 3.1    | Splice_donor | C>T/A>G      | 7592    | 3594+4A>G            |                        |                  |
|       | DNMT3A | 0.6    | Frameshift   | Not SNV      | 8259    | 1066_1073delCAGGCCAC | Gln356Valfs*34         |                  |
| 1224  | TET2   | 1.8    | Missense     | C>A/T>G      | 10657   | 3633T>G              | Cys1211Trp             |                  |
| 1226  | DNMT3A | 1.0    | Splice_donor | G>C          | 8052    | 1015-1G>C            |                        |                  |
|       | DNMT3A | 0.7    | Frameshift   | Not SNV      | 8896    | 1439dupT             | Tyr481Valfs*11         |                  |
| 1228  | TET2   | 10.3   | Splice_donor | C>T/A>G      | 9570    | 3500+4A>G            |                        |                  |
| 1229  | DNMT3A | 2.1    | Missense     | C>A/T>G      | 9537    | 2069T>G              | Val690Gly              |                  |
|       | DNMT3A | 0.3    | Missense     | C>T/A>G      | 9424    | 1903C>T              | Arg635Trp              |                  |
| 1230  | DNMT3A | 2.0    | Missense     | T>C/G>A      | 8563    | 2645G>A              | Arg882His              |                  |
|       | DNMT3A | 0.9    | Splice_donor | A>C/G>T      | 9038    | 2597+1G>T            |                        |                  |
| 1235  | TET2   | 0.4    | Missense     | T>G/C>A      | 8439    | 4118C>A              | Ala1373Glu             |                  |
| 1238  | TET2   | 0.5    | Frameshift   | Not SNV      | 10486   | 4799_4800insATGAG    | Ser1601*fs*1           |                  |
| 1239  | TET2   | 0.7    | Stop         | C>T/A>G      | 7851    | 2887C>T              | Gln963*                |                  |
| 1240  | DNMT3A | 2.0    | Missense     | T>C/G>A      | 7544    | 869T>C               | Phe290Ser              |                  |
| 1241  | TET2   | 0.4    | Missense     | T>C/G>A      | 11728   | 3782G>A              | Arg1261His             |                  |
| 1242  | DNMT3A | 0.5    | Stop         | C>T/A>G      | 9519    | 691C>T               | Gln231*                |                  |
|       | DNMT3A | 0.9    | Frameshift   | Not SNV      | 7998    | 1505_1506delTT       | Val502Aspfs*43         |                  |

**Supplemental Table 4. Detailed characteristics of excluded mutation.**

**Supplemental Table 5**

| Mutation status |      |      | Odds Ratio (CI 95%) |                   |
|-----------------|------|------|---------------------|-------------------|
|                 | Mut+ | Mut- | Crude               | Age-adjusted      |
| Cases (n=36)    | 17   | 19   | 5.5 (1.7 to 17.5)   | 5.9 (1.8 to 19.1) |
| Controls (n=36) | 5    | 31   |                     |                   |

  

| CD7 Expression  |      |      | Odds Ratio (CI 95%) |  |
|-----------------|------|------|---------------------|--|
|                 | CD7+ | CD7- |                     |  |
| Cases (n=32)    | 12   | 20   | 6.6 (1.6 to 26.2)   |  |
| Controls (n=36) | 3    | 33   |                     |  |

**Supplemental Table 5. Odds Ratios for development of tMN for patients with one or more detectable mutations, or aberrant expression of CD7.**



# Supplementary Figures

## Supplemental Figure 1.

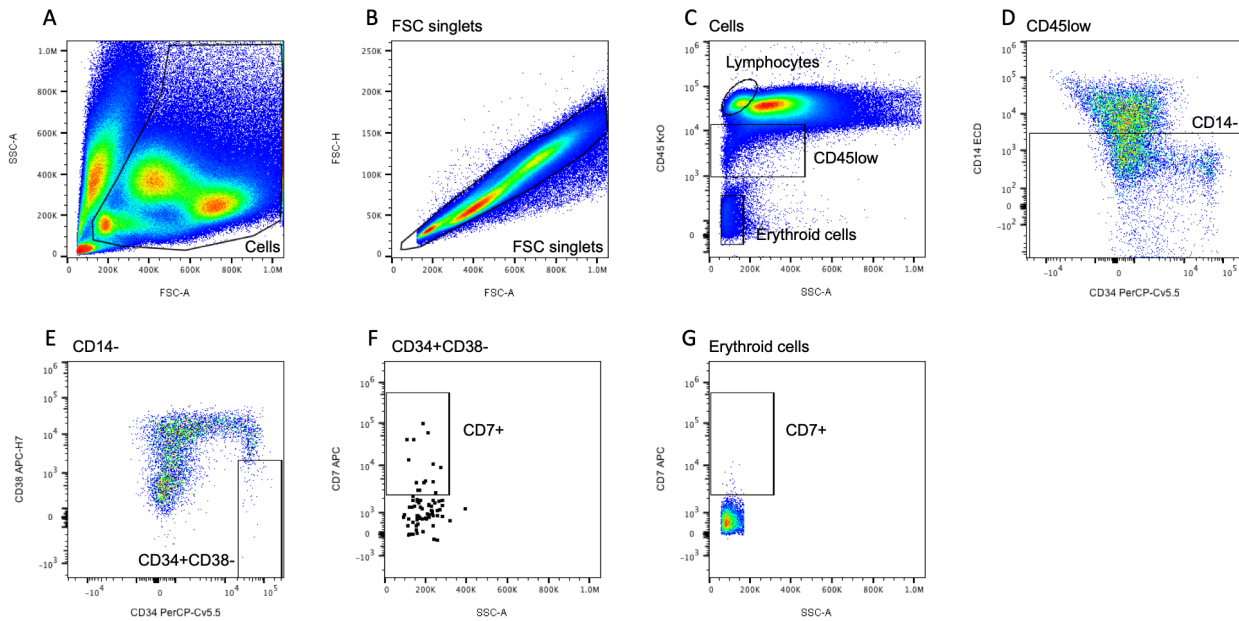

**Supplemental Figure 1. Gating strategy.** Representative gating strategy for CD7 expression analysis on the CD34<sup>+</sup>CD38<sup>-</sup> stem cells (ID1175 used as example). Initially, intact cells were gated in a forward scatter (FSC-A) vs. side scatter (SSC-A) plot (A), and singlets (B) were depicted within a SSC-A and CD45 expression plot for identification of lymphocytes and CD45<sup>low</sup> cells (C). Within the CD45<sup>low</sup> population, CD14<sup>-</sup> (D) CD34<sup>+</sup>CD38<sup>-</sup> cells were selected (E) and displayed in a SSC-A vs. CD7 plot for further gating of their CD7 expression (F). CD7<sup>+</sup> lymphocytes were gated within the lymphocyte population (G) and erythroid cells were used as internal negative control for CD7 positivity. The CD7<sup>+</sup> stem cells were back gated into the CD45<sup>low</sup>SSC<sup>low</sup>CD14<sup>-</sup>CD34<sup>+</sup>CD38<sup>-</sup> population, as shown in Figure 3 in the manuscript

**Supplemental Figure 2.**

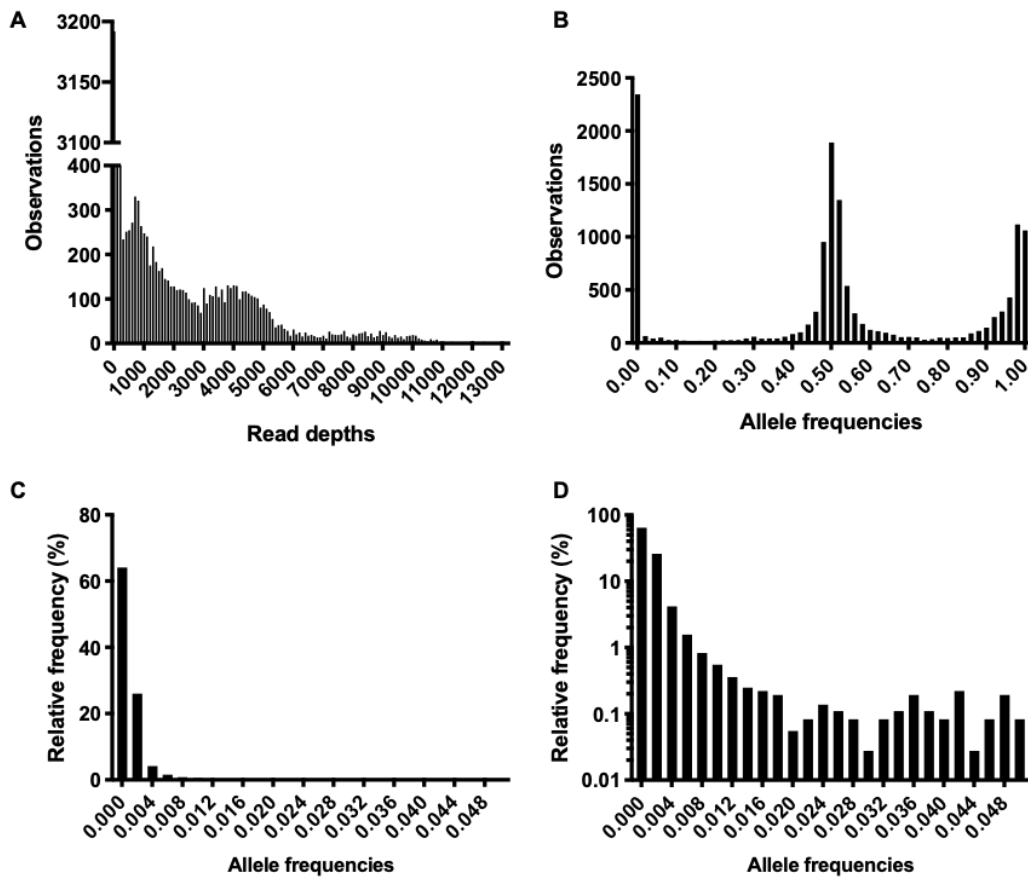

**Supplemental Figure 2. Quality of targeted next-generation sequencing for determination of variant calling.** (A) Number of observations per read depth; (B) Number of observations by allele frequency; (C) Relative frequency of observations by allele frequency; (D) Relative frequency of observations on logarithmic scale by allele frequency.

**Supplemental Figure 3.**

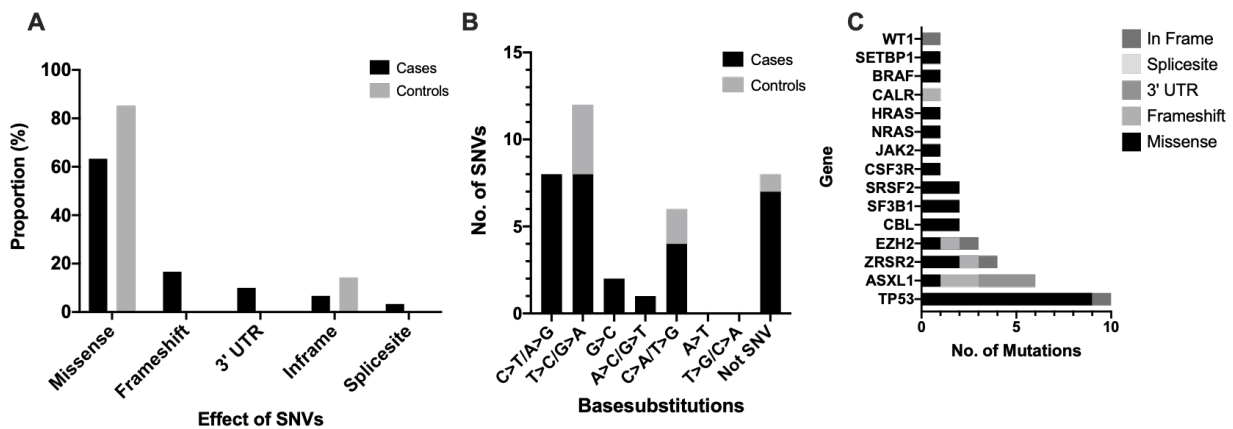

**Supplemental Figure 3. Numbers and characteristics of somatic mutations detected by NGS in cases and controls.** (A) Proportion of SNVs sorted by predicted effect on gene-expression; (B) Distribution of individual basesubstitutions; (C) Predicted effect of SNVs detected in each gene. 3' UTR, Three prime untranslated region; NGS, Next-Generation Sequencing; SNV, single-nucleotide variant. Cases, Black; Controls, Grey.

### Supplemental Figure 4

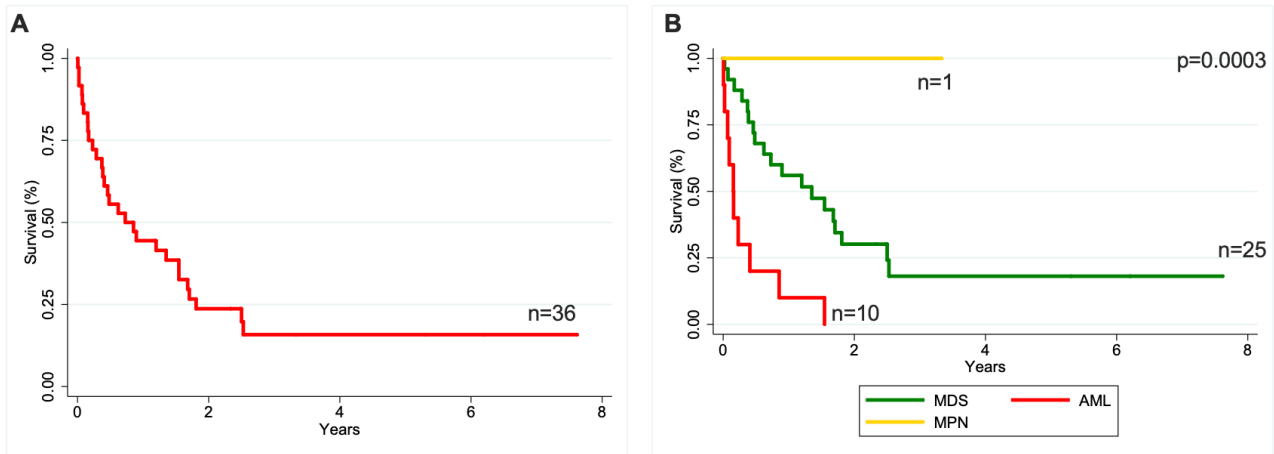

**Supplemental Figure 4. Survival of patients with tMN.** (A) Overall survival for the entire tMN cohort; (B) Overall survival among tAML (red), tMDS (green) and tMPN (yellow). P-value for Log-Rank test.
